# Supplementary material for: Synthesis of disaccharide modified berberine derivatives and their anti-diabetic investigation in zebrafish using a fluorescence-based technology
Source: Royal Society of Chemistry journal article supplement (doi:10.1039/d0ob00327a), 2020-01-01
Supplement: d0ob00327a1.pdf [file d0ob00327a1.pdf]

## Supplementary File for

### Synthesis of disaccharide modified berberine derivatives and their anti-diabetic investigation in zebrafish using a fluorescence-based technology

Lizhen Wang,<sup>a,§,\*</sup> Haotian Kong,<sup>a,§</sup> Meng Jin,<sup>a</sup> Xiaobin Li,<sup>a,b</sup> Rostyslav Stoyka,<sup>c</sup> Houwen Lin,<sup>d</sup>  
Kechun Liu<sup>a,b,\*</sup>

#### Table of Contents

|                                                                   |       |         |
|-------------------------------------------------------------------|-------|---------|
| Figure S1                                                         | ----- | pageS2  |
| <sup>1</sup> H, <sup>13</sup> C NMR spectra of compound <b>13</b> | ----- | pageS3  |
| <sup>1</sup> H, <sup>13</sup> C NMR spectra of compound <b>24</b> | ----- | pageS4  |
| <sup>1</sup> H, <sup>13</sup> C NMR spectra of compound <b>25</b> | ----- | pageS5  |
| <sup>1</sup> H, <sup>13</sup> C NMR spectra of compound <b>26</b> | ----- | pageS6  |
| <sup>1</sup> H, <sup>13</sup> C NMR spectra of compound <b>27</b> | ----- | pageS7  |
| <sup>1</sup> H, <sup>13</sup> C NMR spectra of compound <b>28</b> | ----- | pageS8  |
| <sup>1</sup> H, <sup>13</sup> C NMR spectra of compound <b>6</b>  | ----- | pageS9  |
| <sup>1</sup> H, <sup>13</sup> C NMR spectra of compound <b>7</b>  | ----- | pageS10 |
| <sup>1</sup> H, <sup>13</sup> C NMR spectra of compound <b>8</b>  | ----- | pageS11 |
| <sup>1</sup> H, <sup>13</sup> C NMR spectra of compound <b>9</b>  | ----- | pageS12 |
| <sup>1</sup> H, <sup>13</sup> C NMR spectra of compound <b>10</b> | ----- | pageS13 |
| <sup>1</sup> H, <sup>13</sup> C NMR spectra of compound <b>1</b>  | ----- | pageS14 |
| <sup>1</sup> H, <sup>13</sup> C NMR spectra of compound <b>2</b>  | ----- | pageS15 |
| <sup>1</sup> H, <sup>13</sup> C NMR spectra of compound <b>3</b>  | ----- | pageS16 |
| <sup>1</sup> H, <sup>13</sup> C NMR spectra of compound <b>4</b>  | ----- | pageS17 |
| <sup>1</sup> H, <sup>13</sup> C NMR spectra of compound <b>5</b>  | ----- | pageS18 |

---

<sup>a</sup>Biology Institute, Qilu University of Technology (Shandong Academy of Sciences), Jinan 250014, Shandong Province, China.

Corresponding author: Lizhen Wang, e-mail: [wzlh1106@126.com](mailto:wzlh1106@126.com); Kechun Liu, e-mail: [liukechun2000@163.com](mailto:liukechun2000@163.com)

<sup>b</sup>Bioengineering Technology Innovation Center of Shandong Province, Heze 274000, Shandong Province, China

<sup>c</sup>Department of Regulation of Cell Proliferation and Apoptosis, Institute of Cell Biology, National Academy of Sciences of Ukraine, Lviv 79005, Ukraine

<sup>d</sup>Research Center for Marine Drugs, State Key Laboratory of Oncogenes and Related Genes, Shanghai Jiao Tong University, Shanghai 200127, China

<sup>§</sup>These authors contributed equally to this paper.

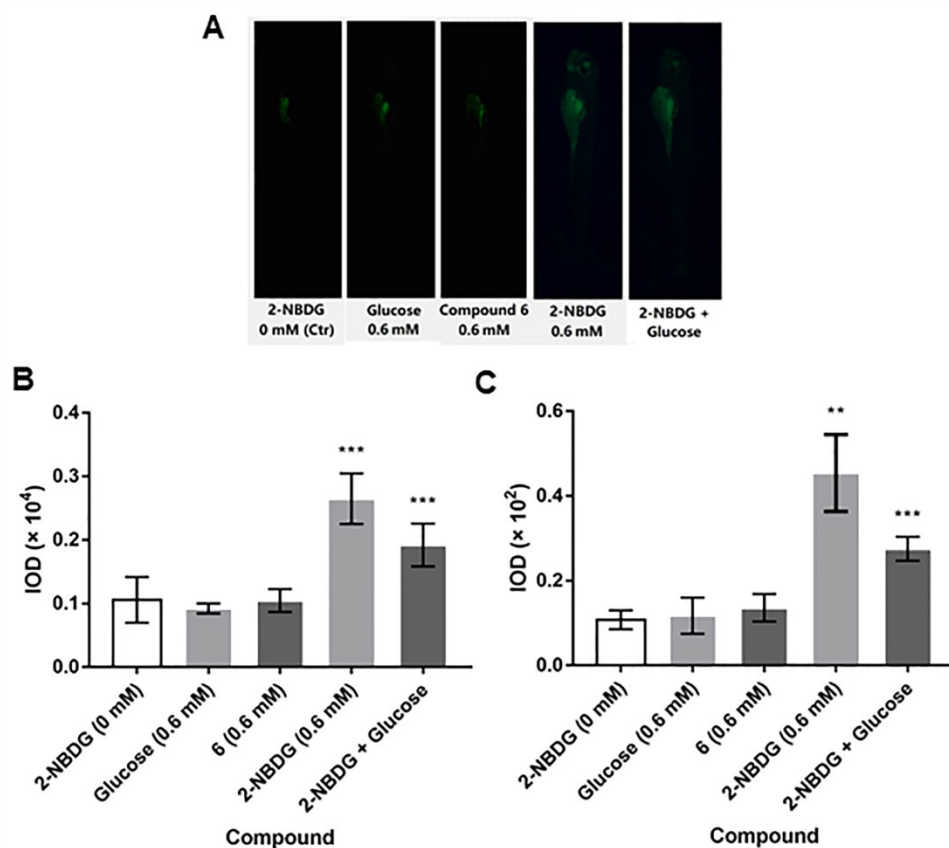

**Figure S1.** Fluorescent image of zebrafish larvae treated with (A) 0 mM of 2-NBDG, 0.6 mM of 2-NBDG, 0.6 mM of glucose, 0.6 mM of compound **6**, and 0.6 mM of 2-NBDG + 0.6 mM of glucose; (B) IOD in zebrafish after incubating with tested compounds mentioned above; (C) IOD in zebrafish eyes after incubating with tested compounds mentioned above.  $**P < 0.01$ ,  $***P < 0.001$  vs zebrafish treated with 0 mM 2-NBDG.

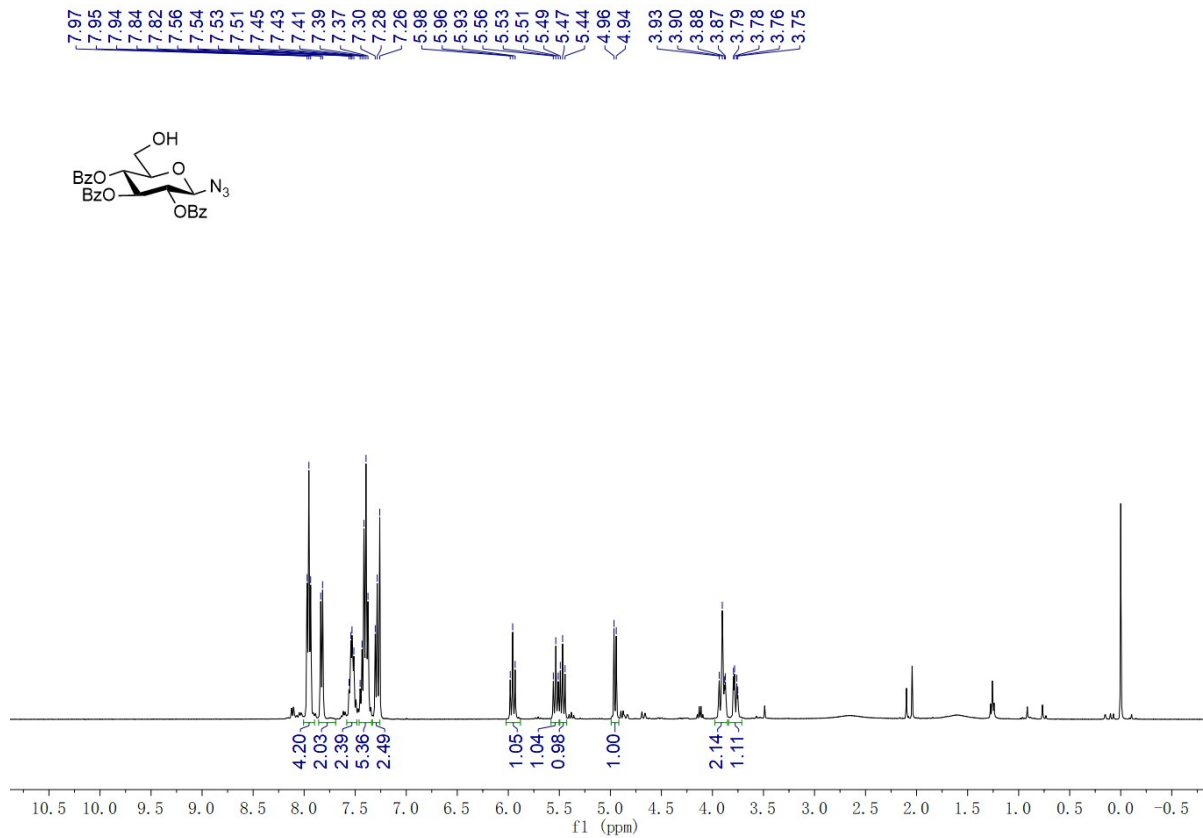

<sup>1</sup>H NMR spectrum of compound **13**

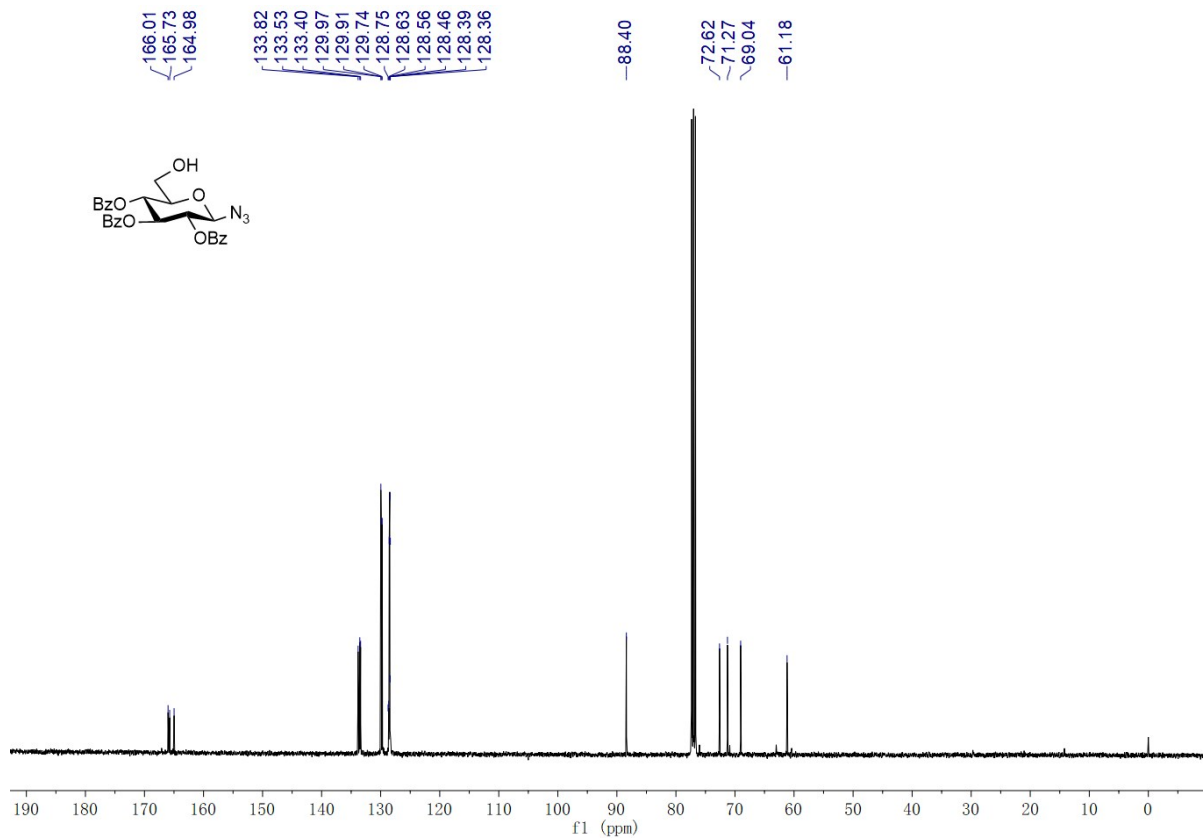

<sup>13</sup>C NMR spectrum of compound **13**

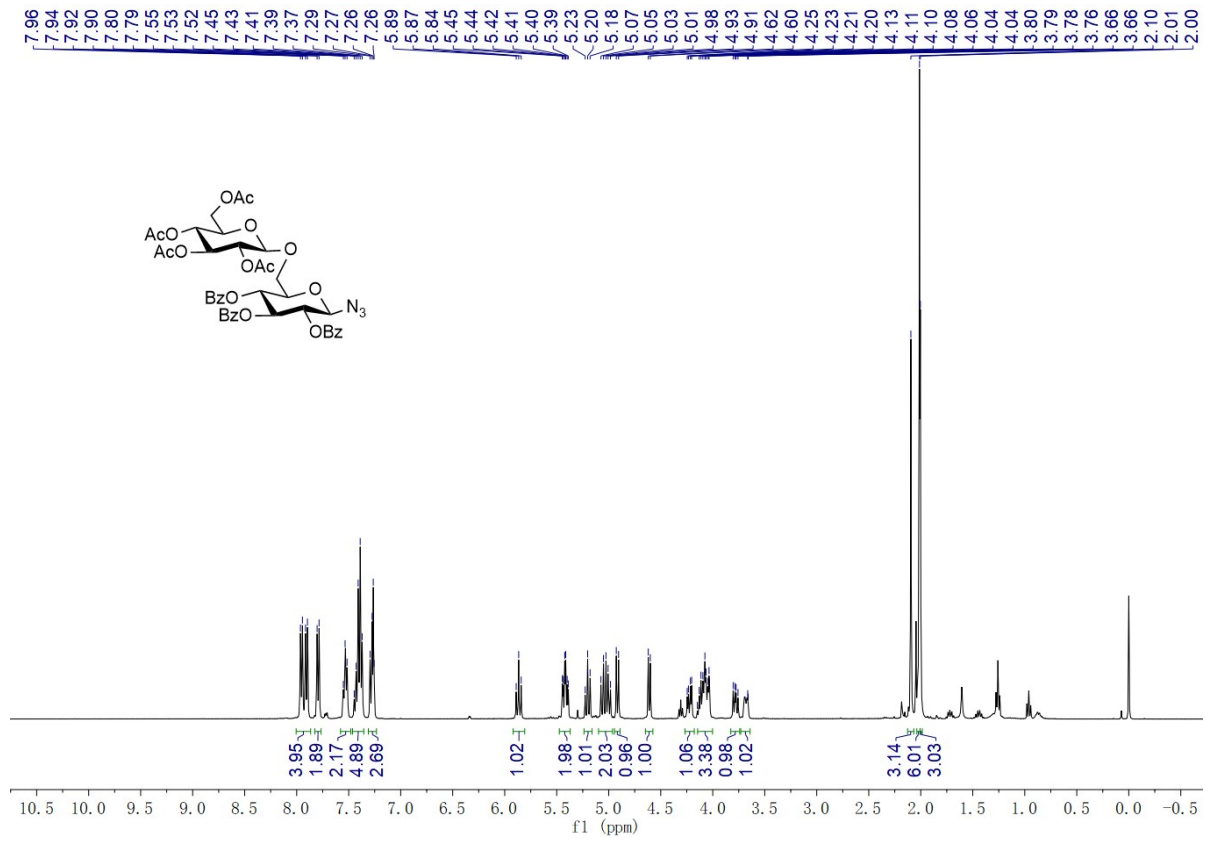

<sup>1</sup>H NMR spectrum of compound 24

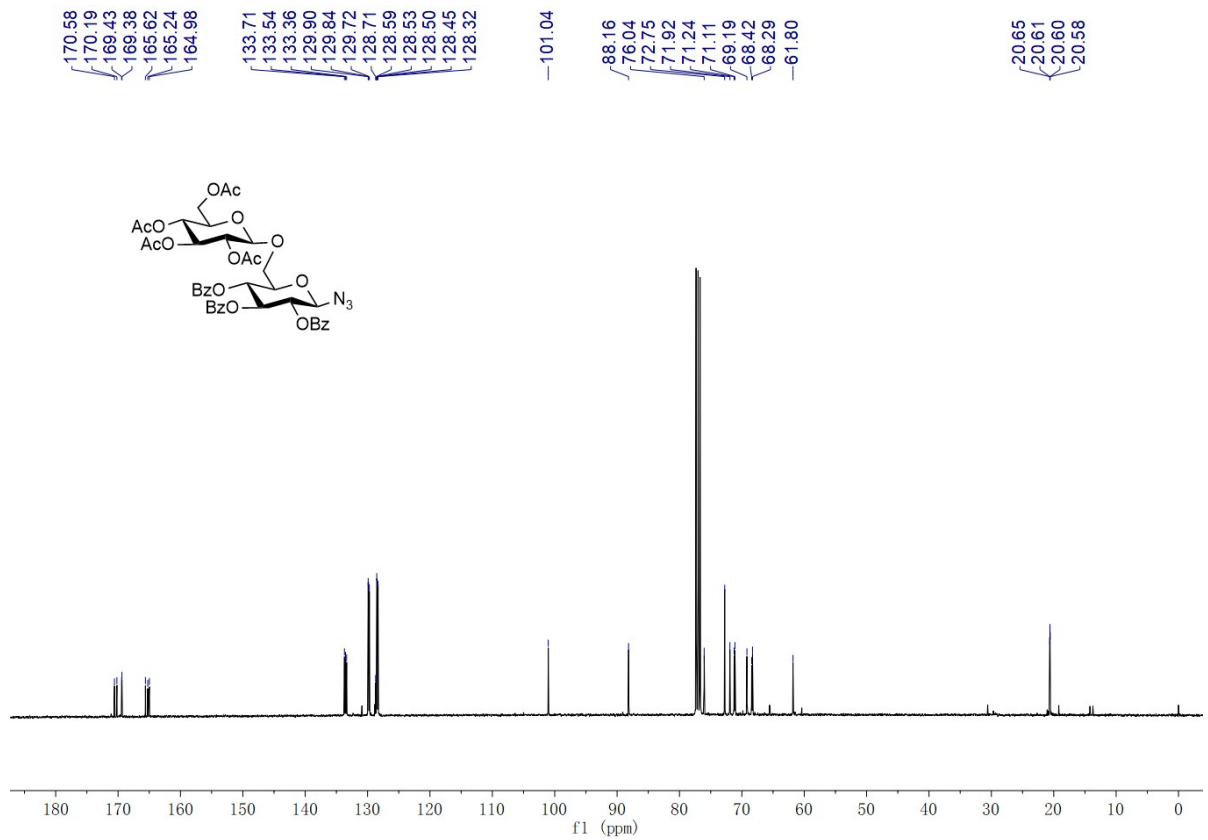

<sup>13</sup>C NMR spectrum of compound 24

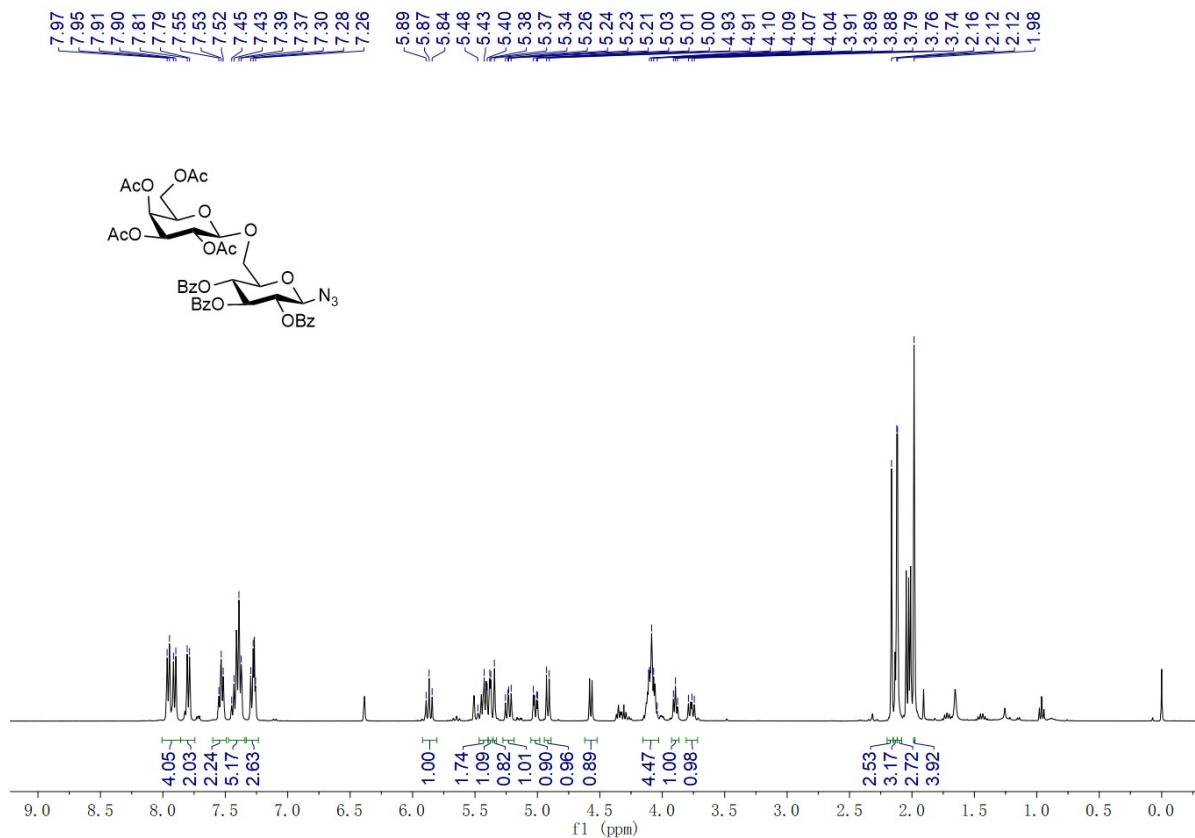

<sup>1</sup>H NMR spectrum of compound 25

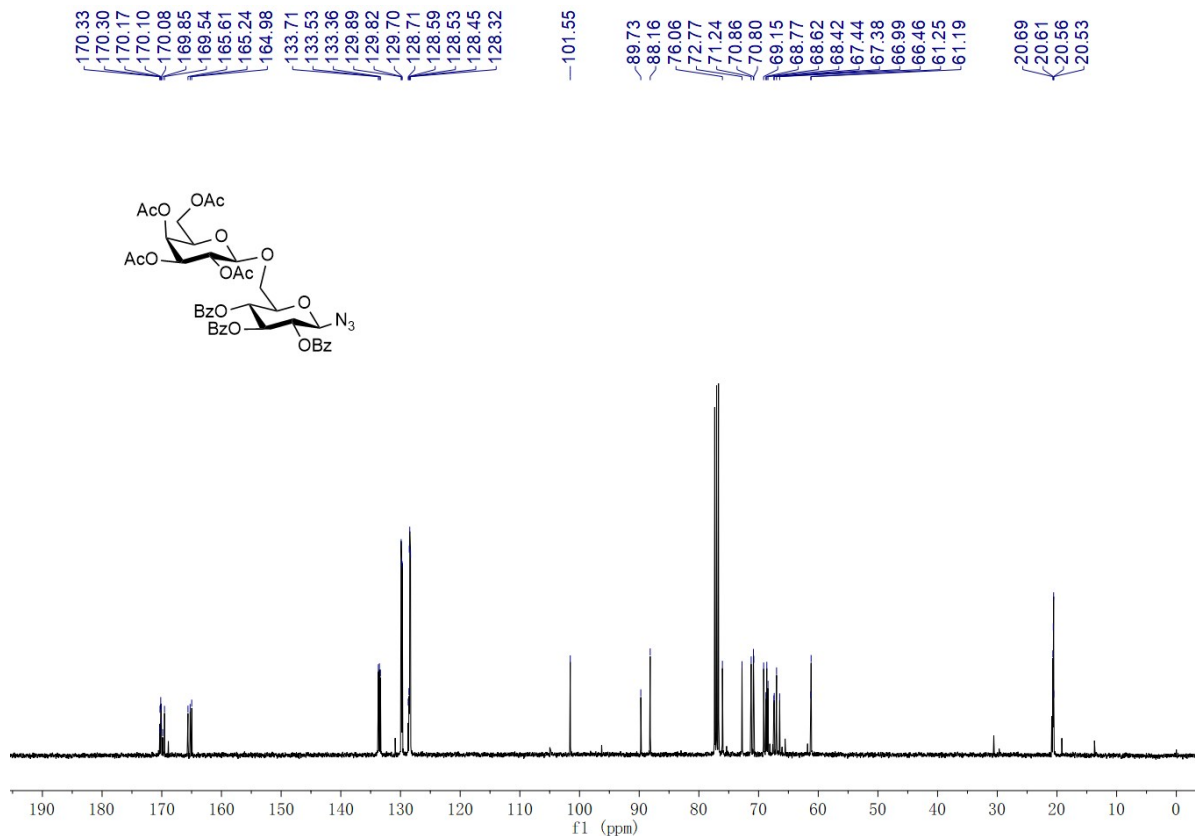

<sup>13</sup>C NMR spectrum of compound 25

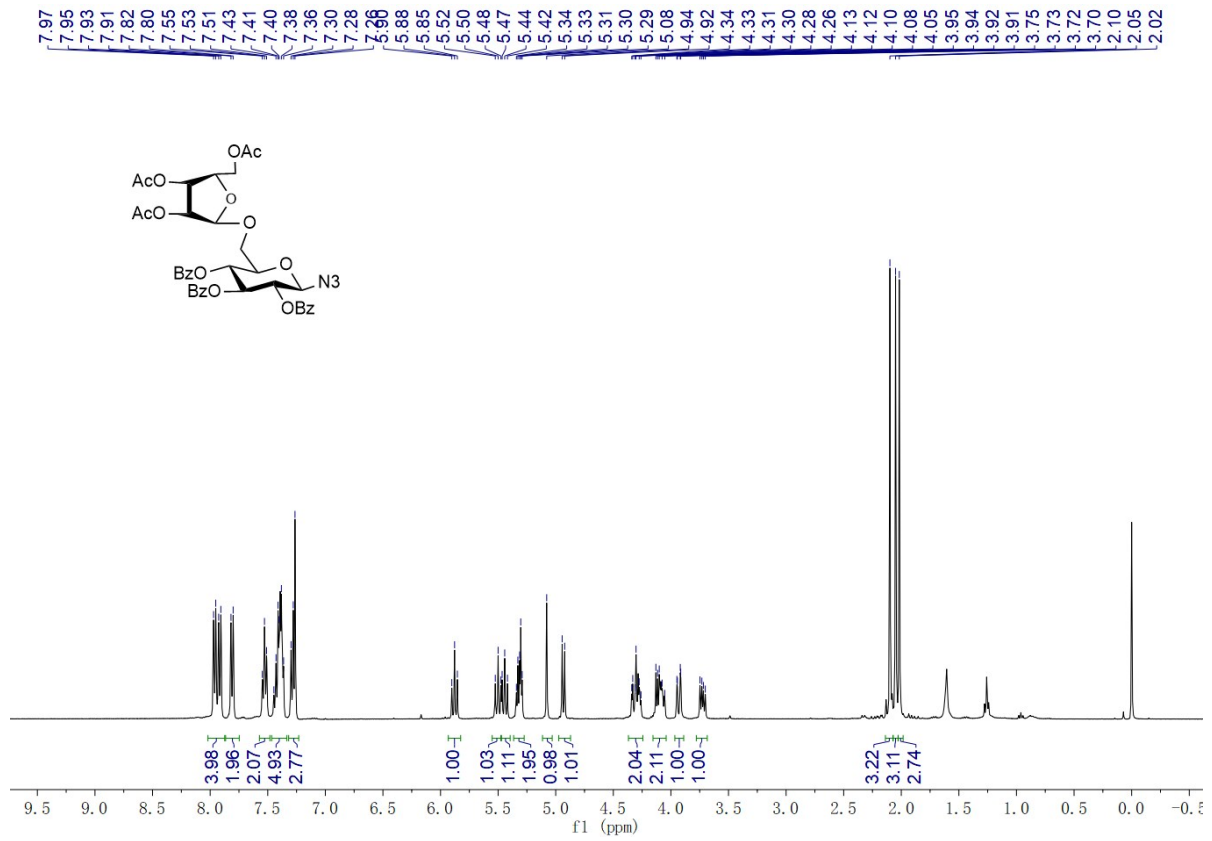

<sup>1</sup>H NMR spectrum of compound 26

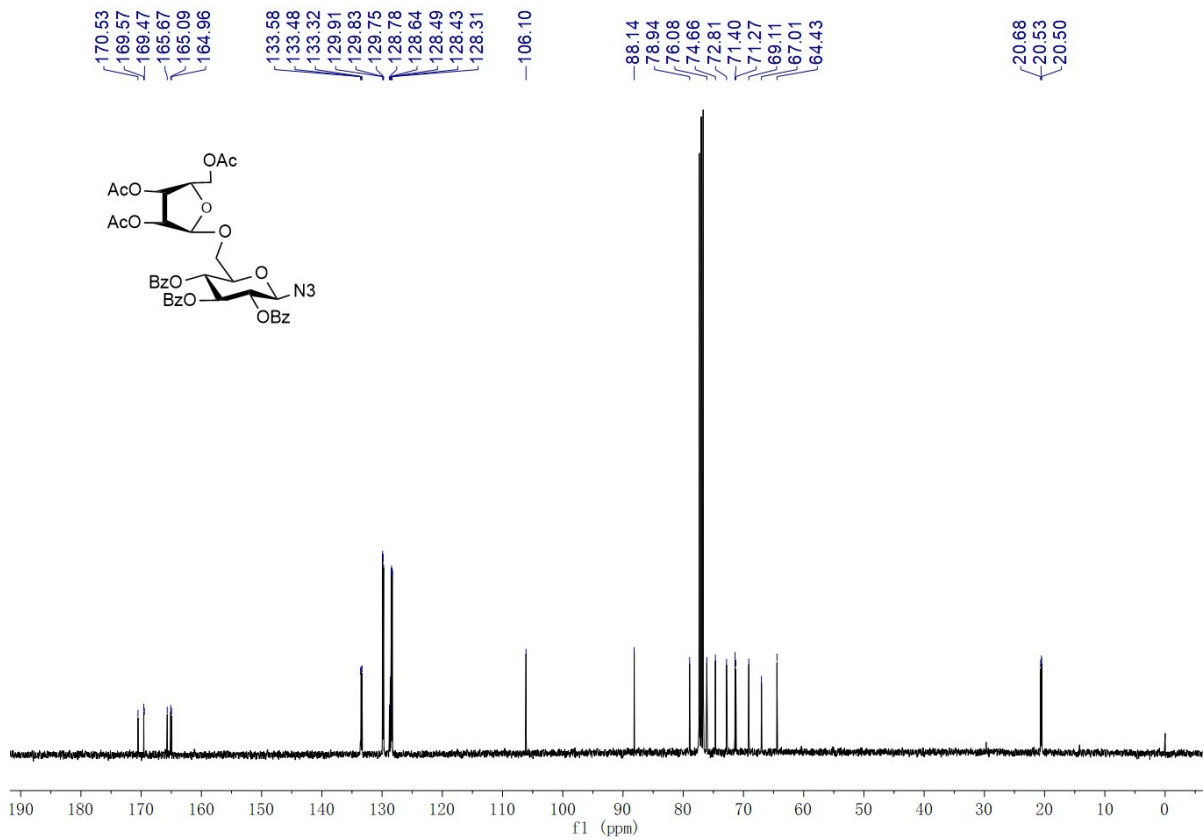

<sup>13</sup>C NMR spectrum of compound 26

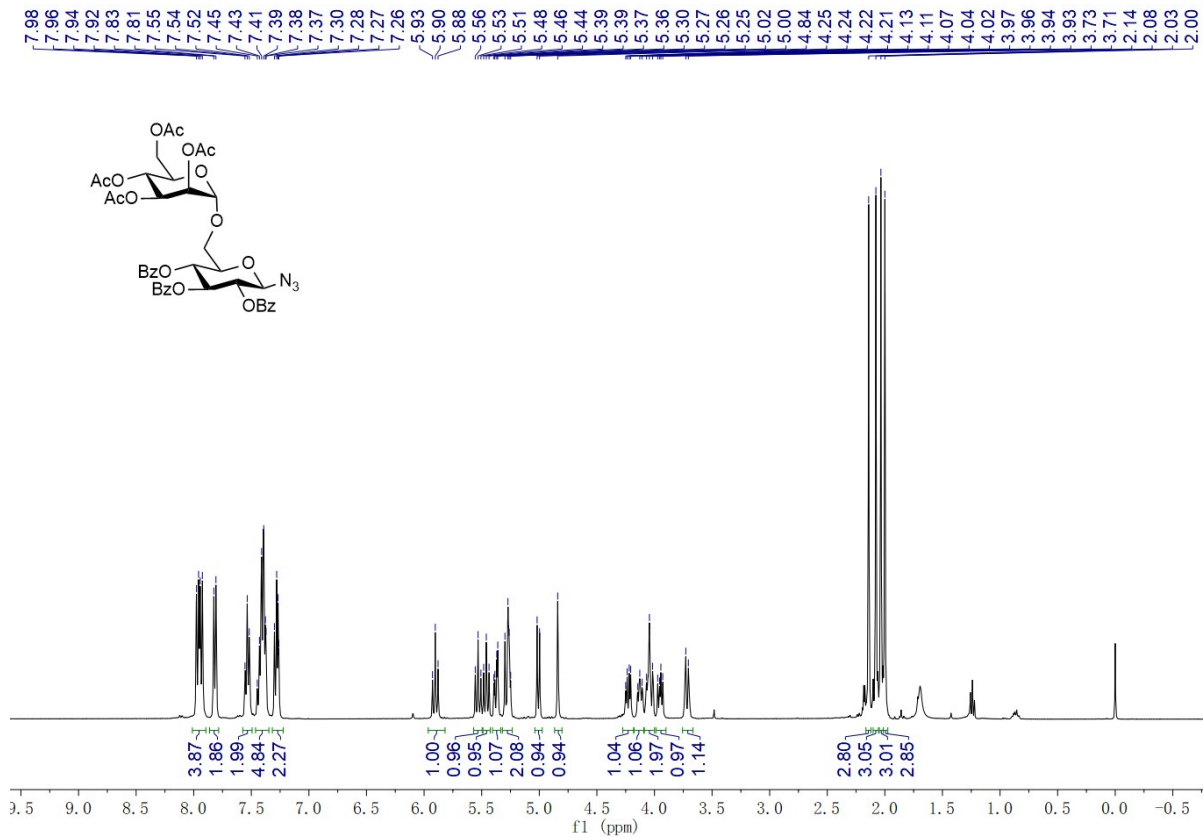

<sup>1</sup>H NMR spectrum of compound 27

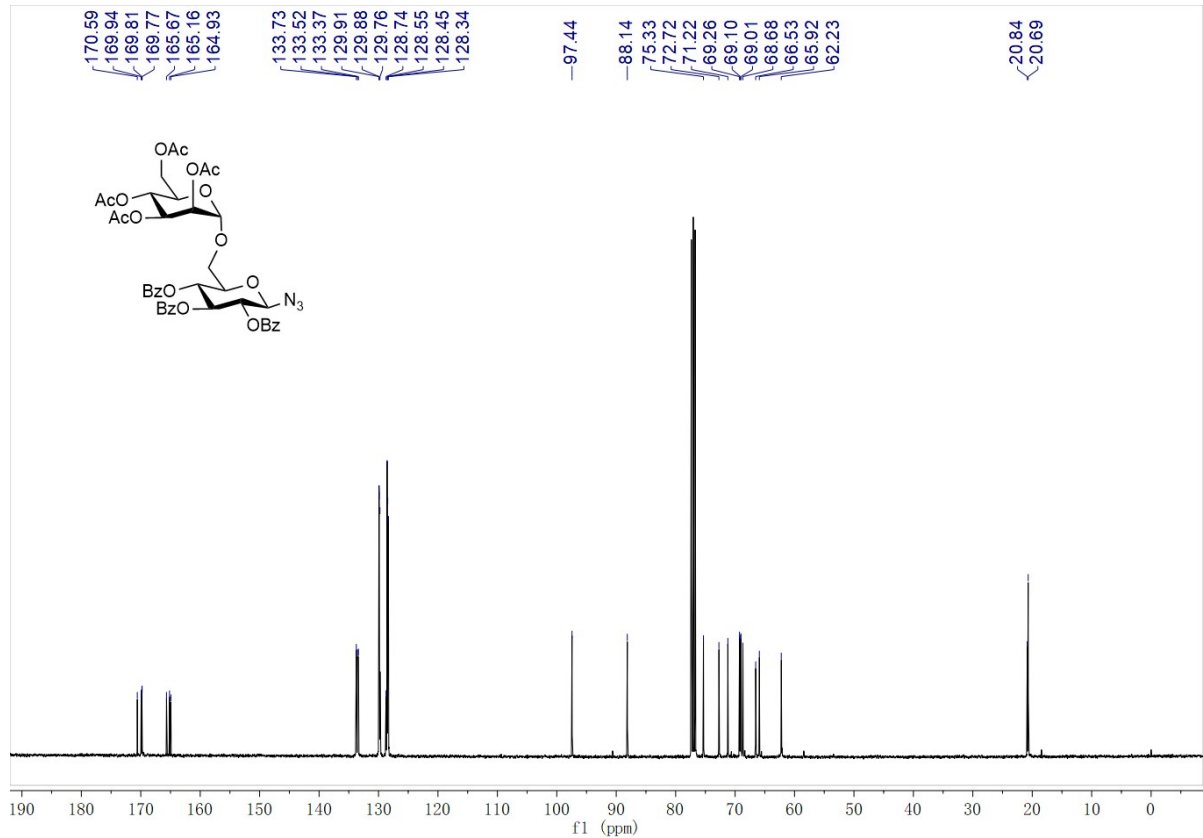

<sup>13</sup>C NMR spectrum of compound 27

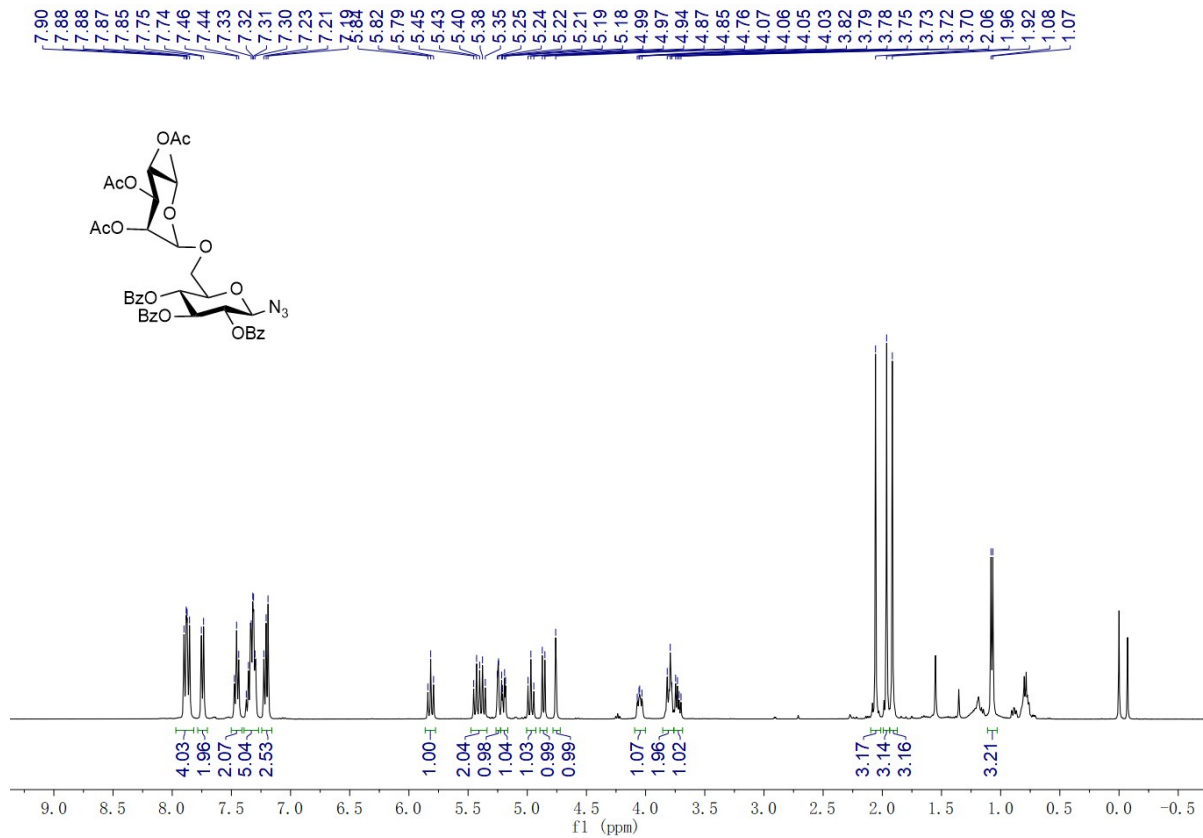

<sup>1</sup>H NMR spectrum of compound 28

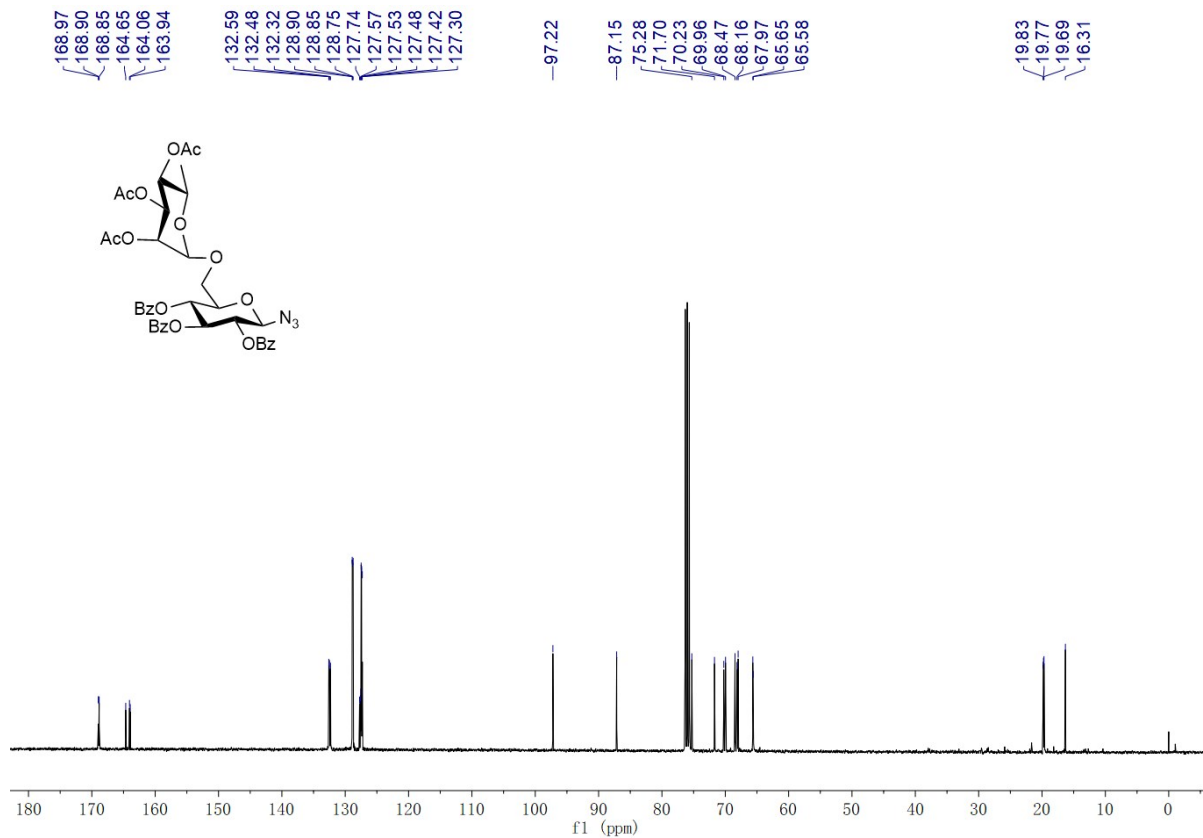

<sup>13</sup>C NMR spectrum of compound 28



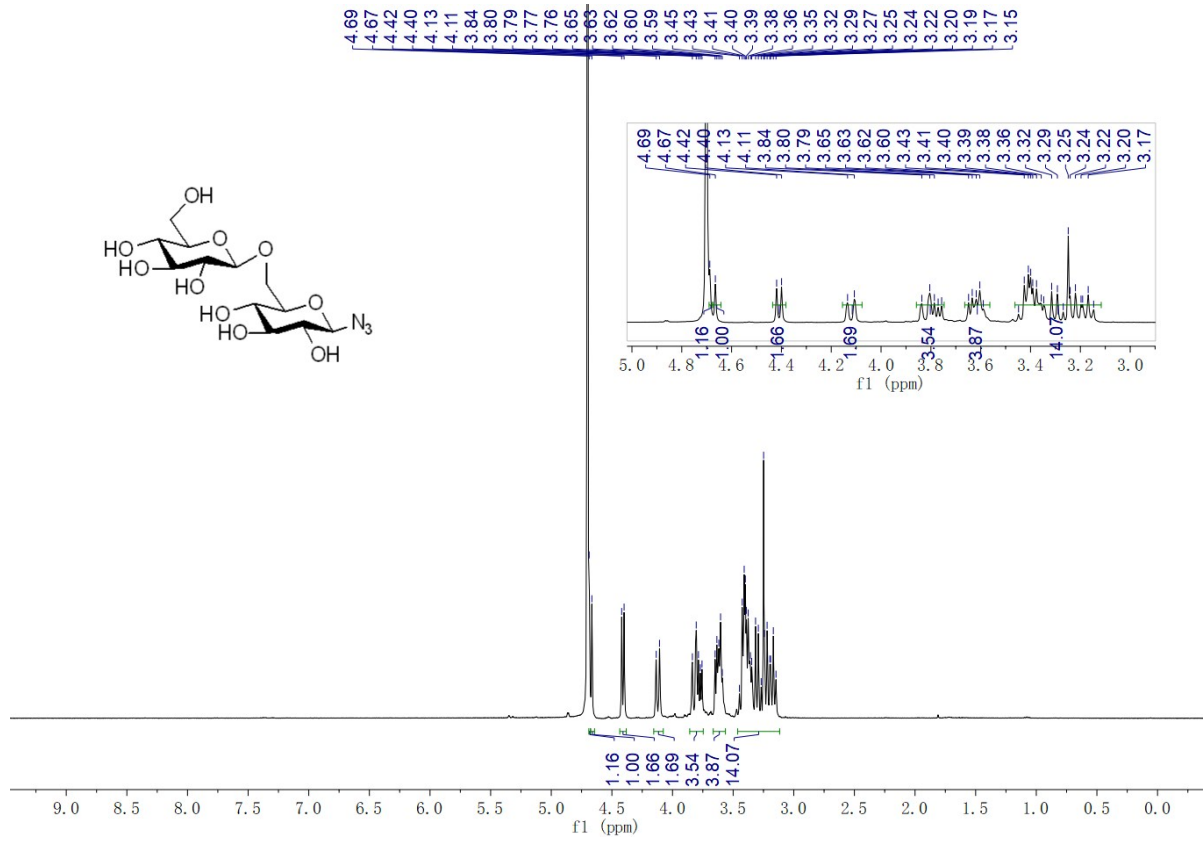

**<sup>1</sup>H NMR spectrum of compound 6**

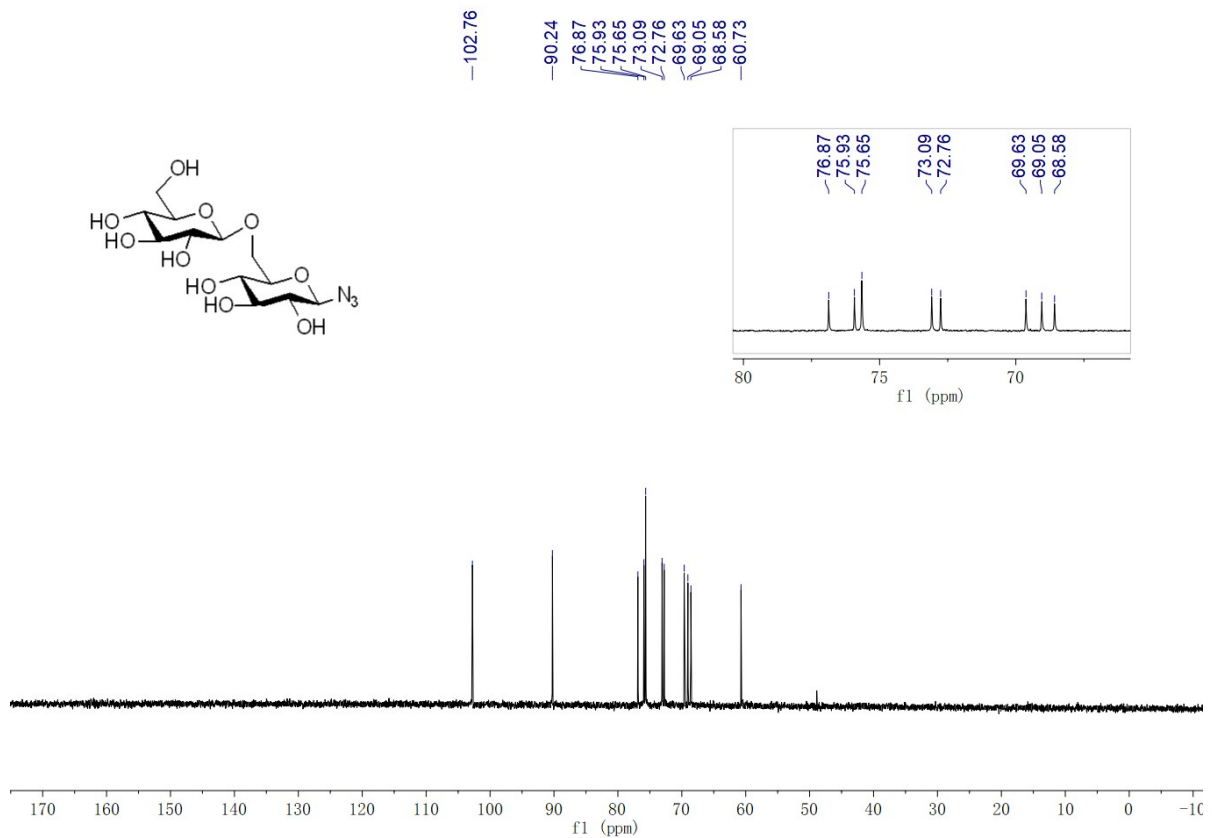

**<sup>13</sup>C NMR spectrum of compound 6**

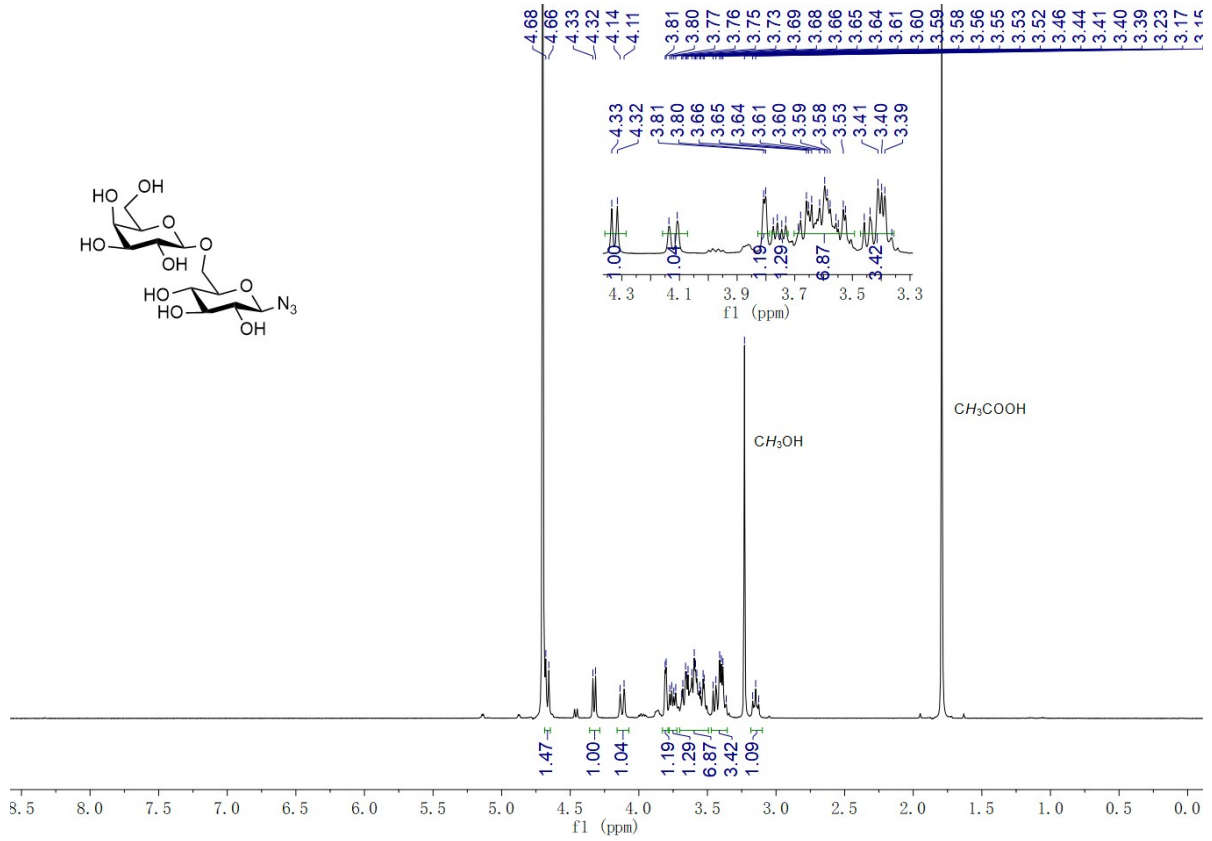

<sup>1</sup>H NMR spectrum of compound 7

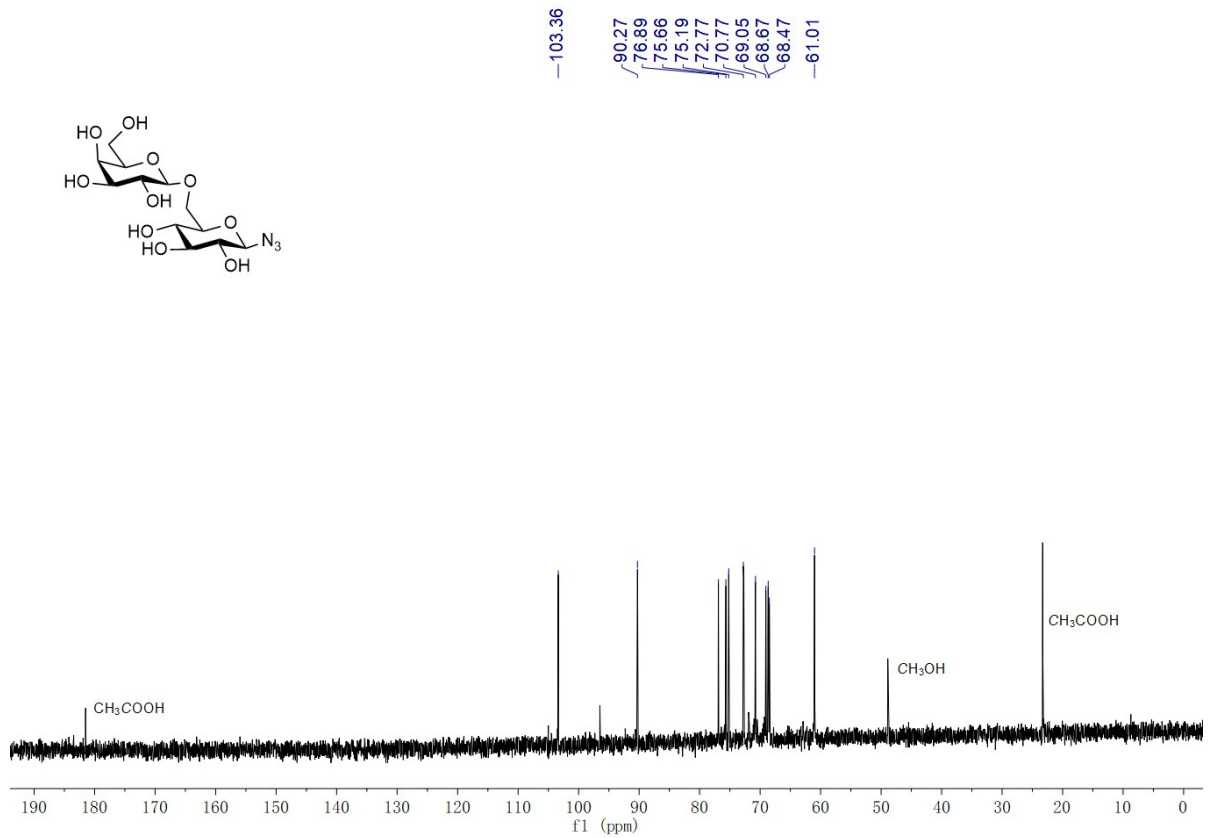

<sup>13</sup>C NMR spectrum of compound 7

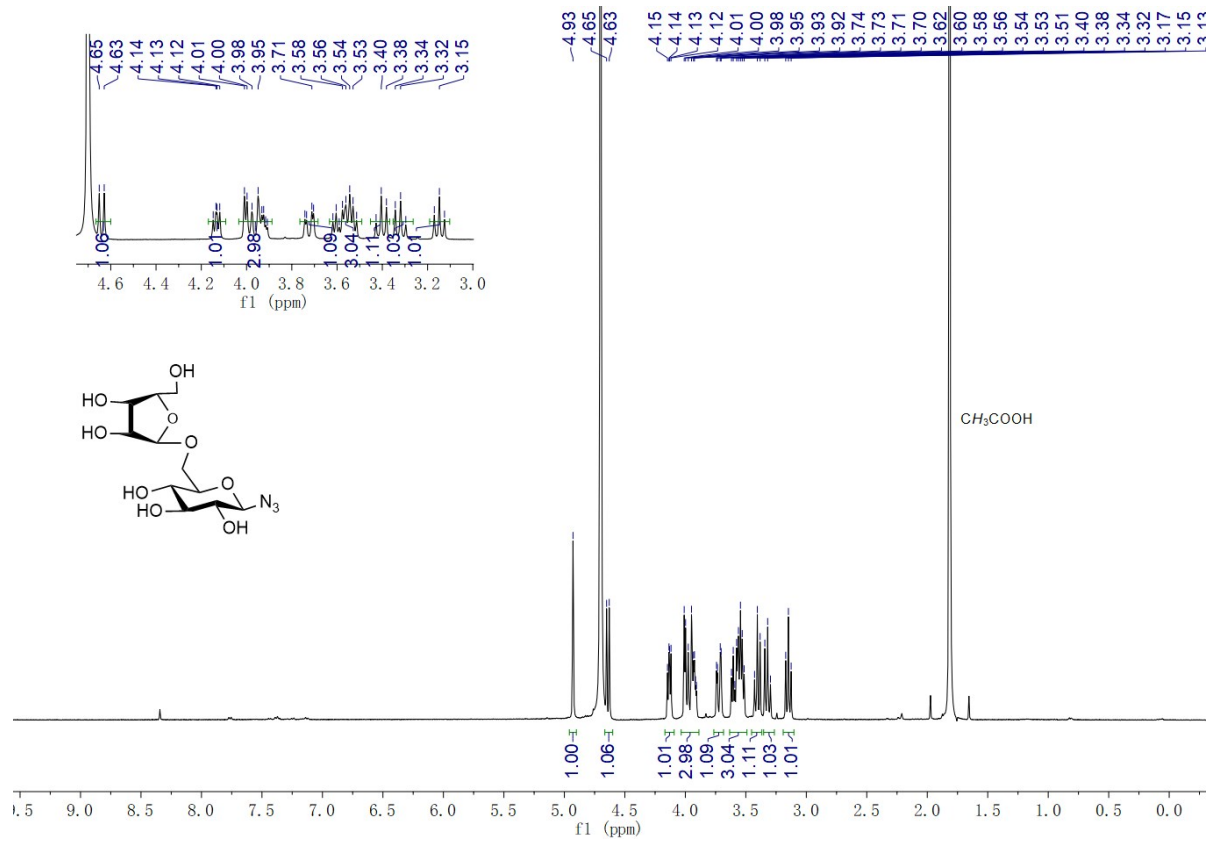

$^1\text{H}$  NMR spectrum of compound **8**

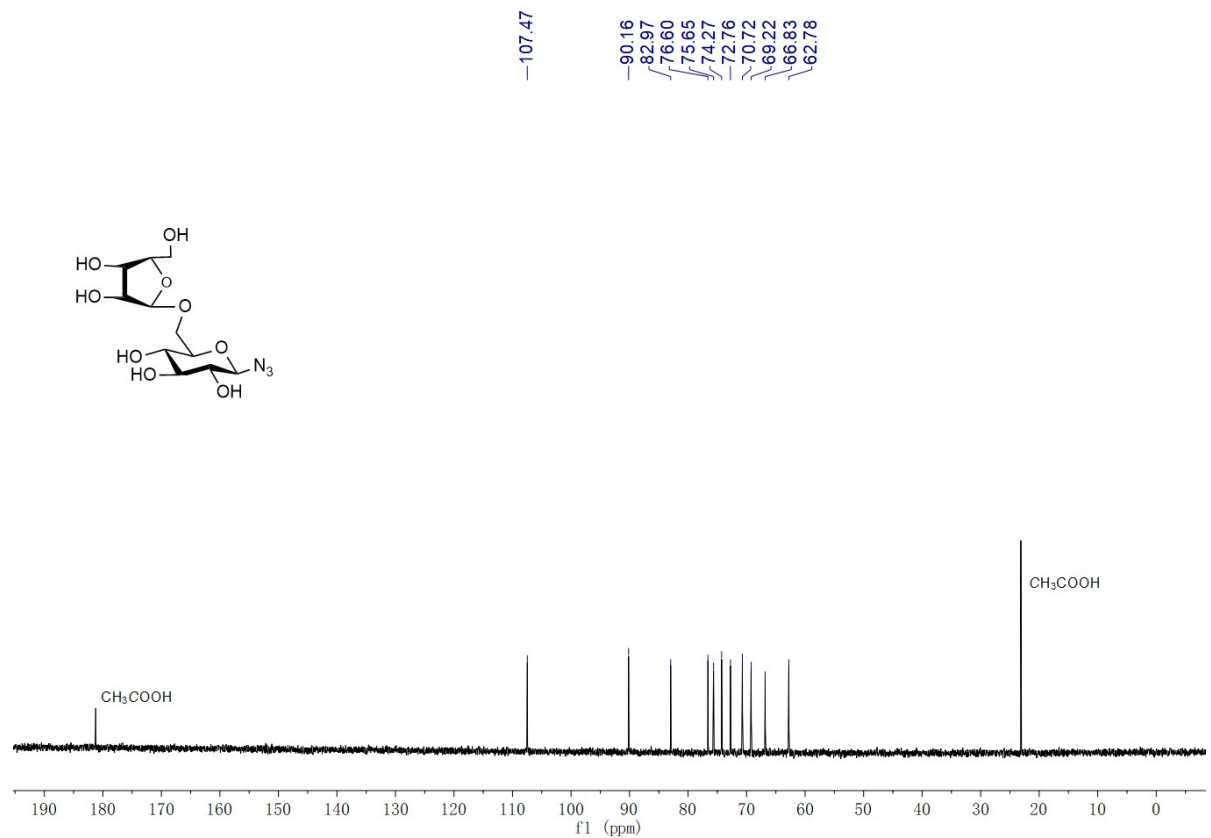

$^{13}\text{C}$  NMR spectrum of compound **8**

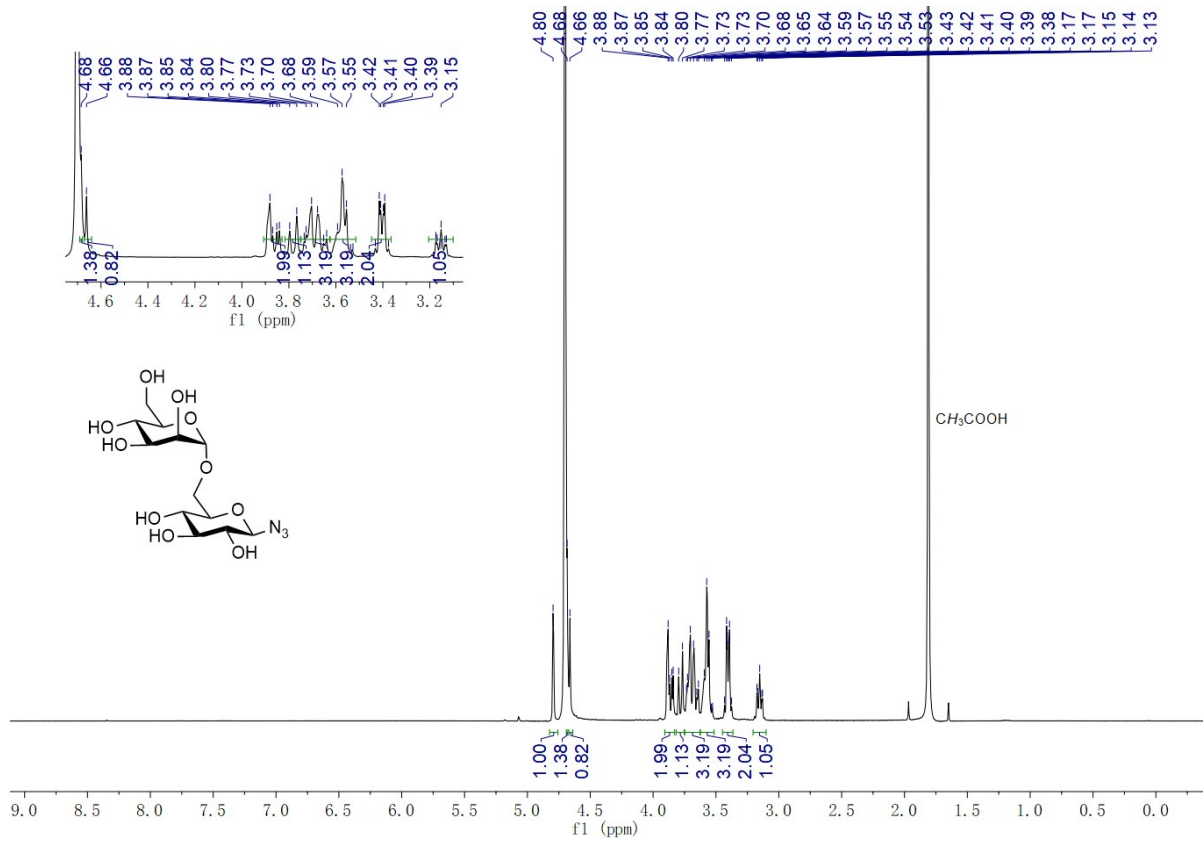

<sup>1</sup>H NMR spectrum of compound 9

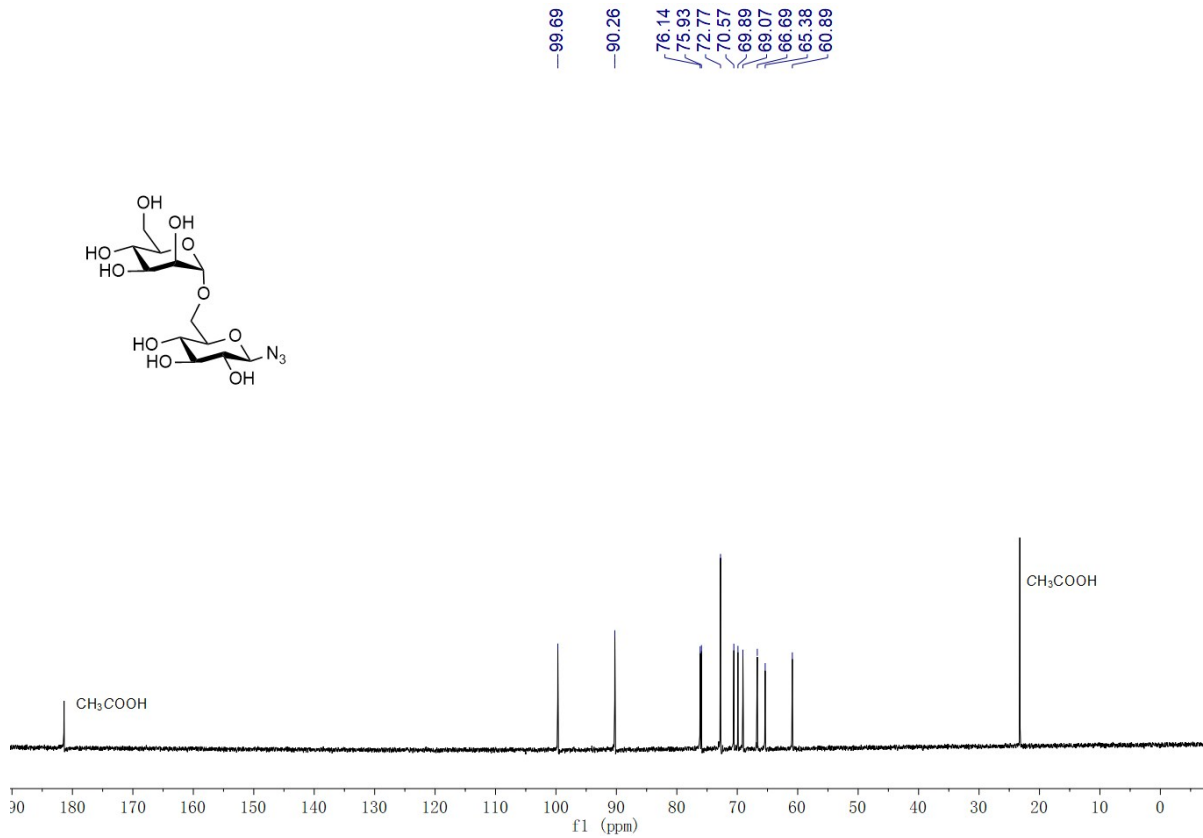

<sup>13</sup>C NMR spectrum of compound 9

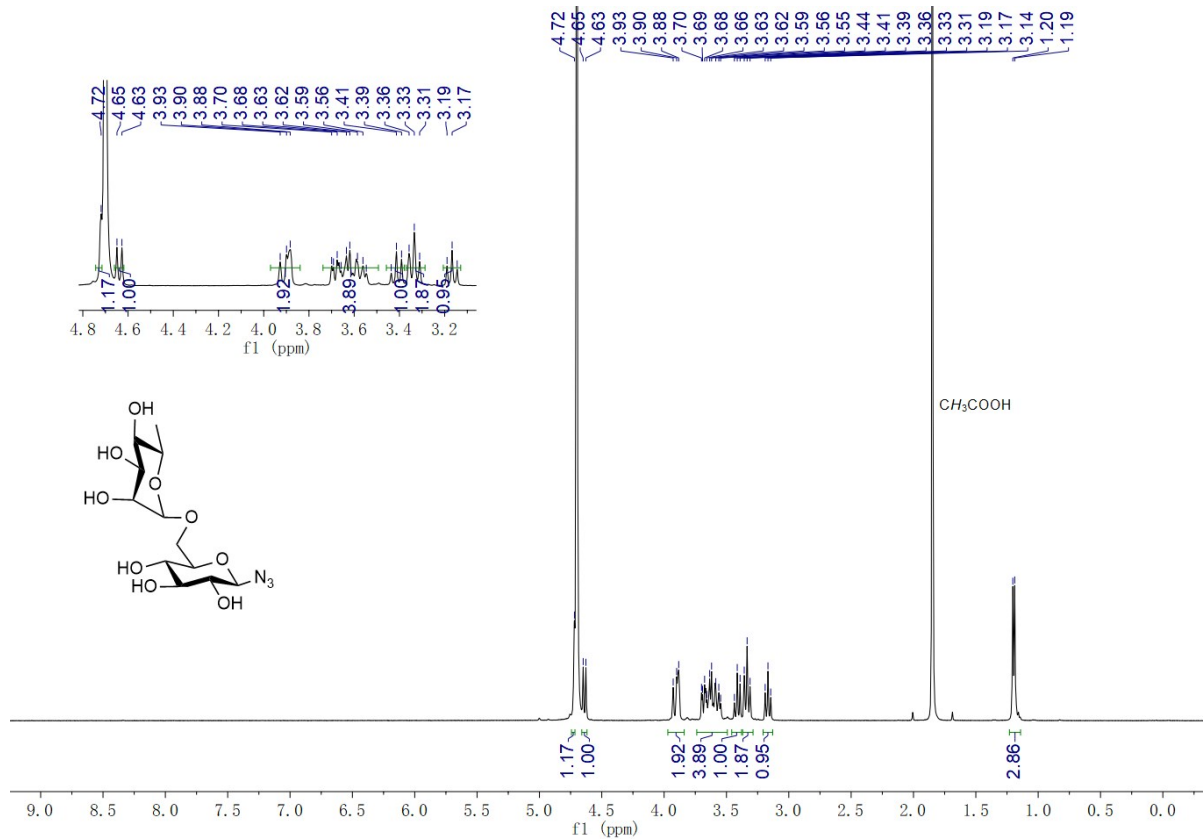

**<sup>1</sup>H NMR spectrum of compound 10**

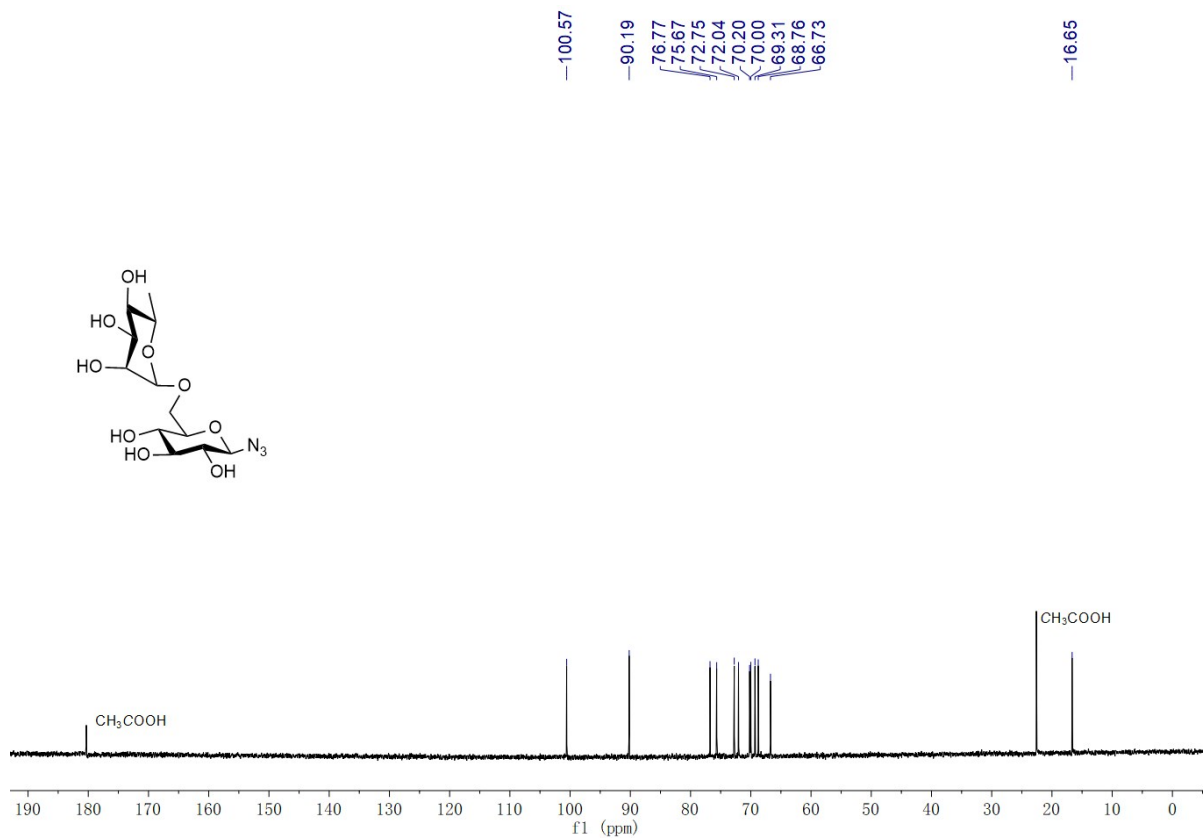

**<sup>13</sup>C NMR spectrum of compound 10**

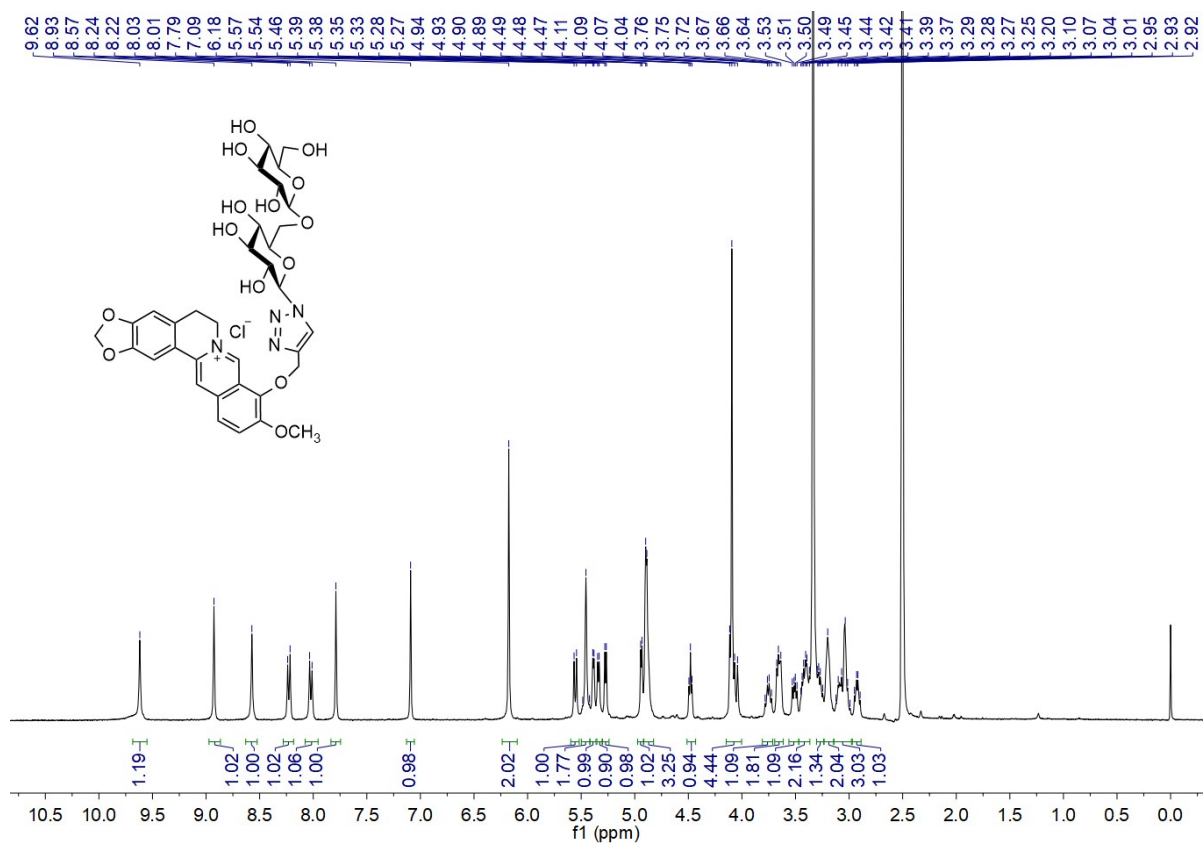

<sup>1</sup>H NMR spectrum of compound 1

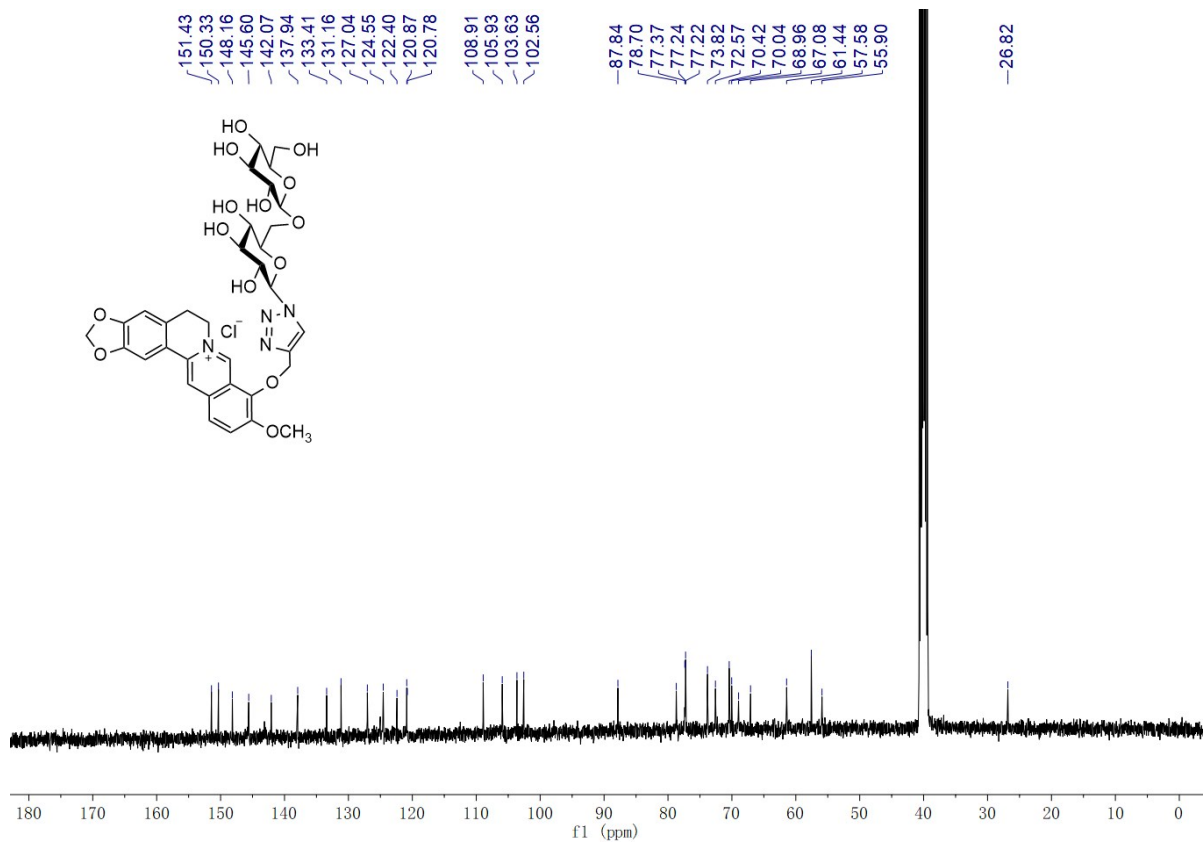

<sup>13</sup>C NMR spectrum of compound 1

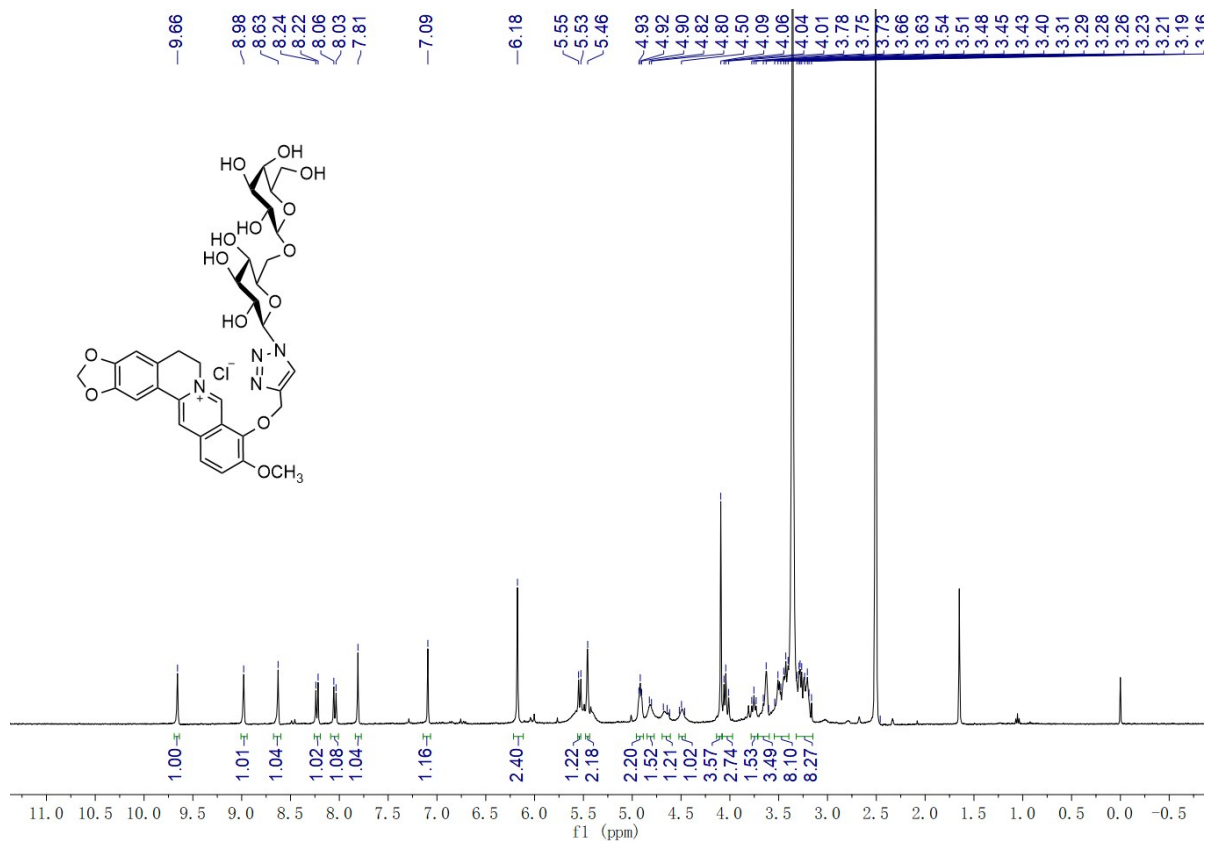

<sup>1</sup>H NMR spectrum of compound 2

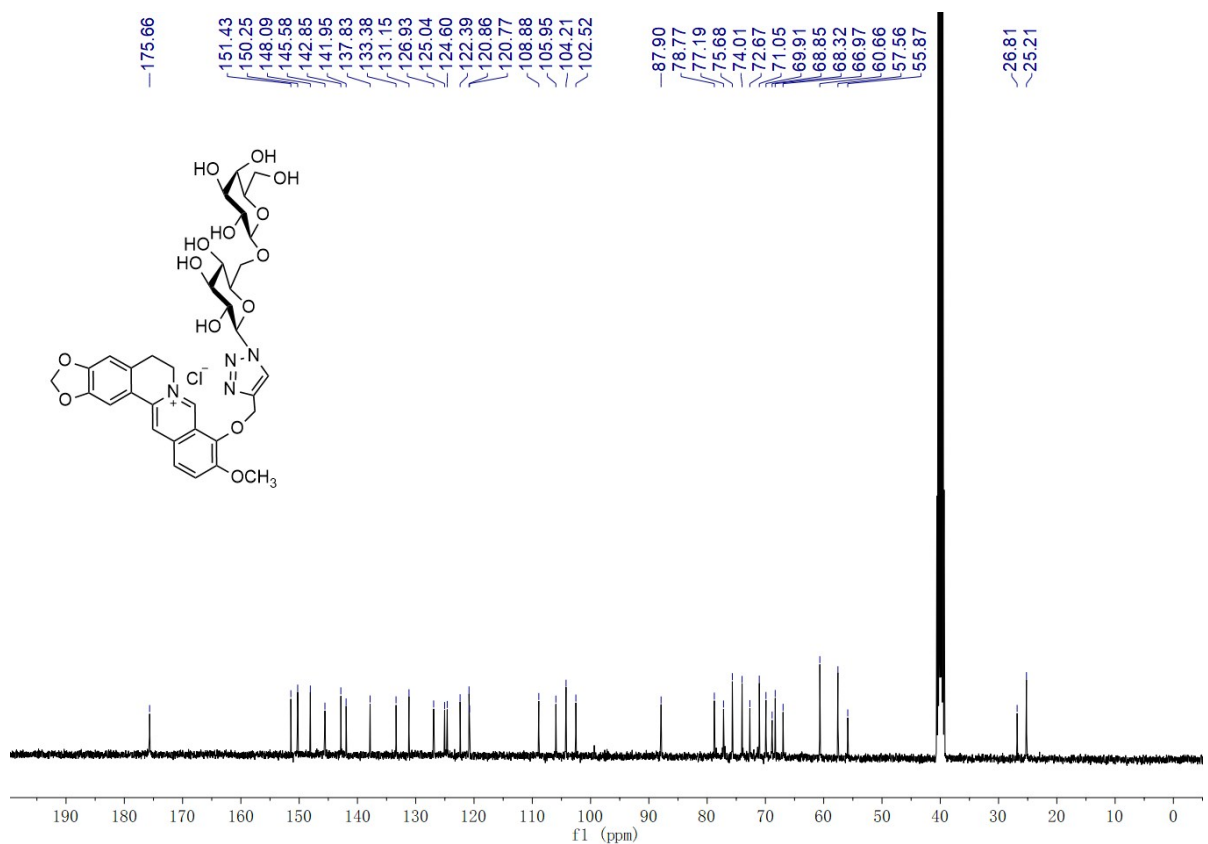

<sup>13</sup>C NMR spectrum of compound 2



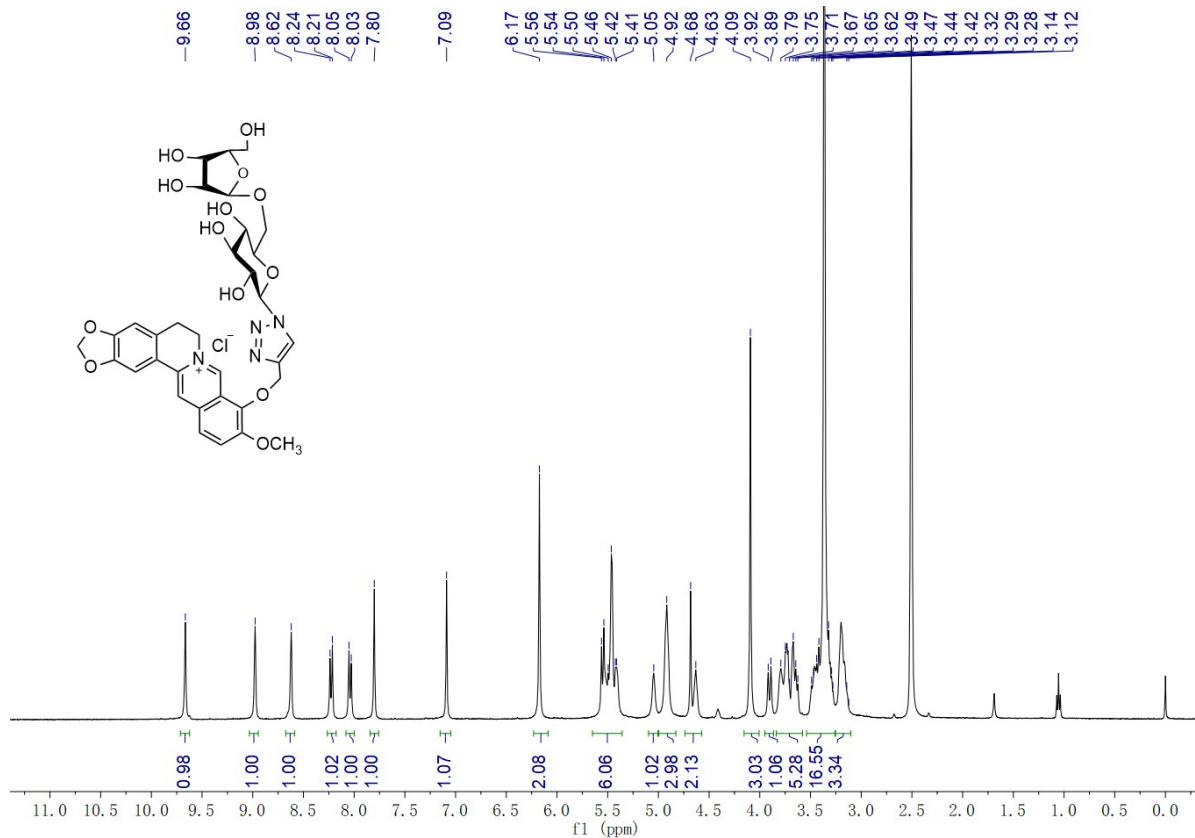

<sup>1</sup>H NMR spectrum of compound 3

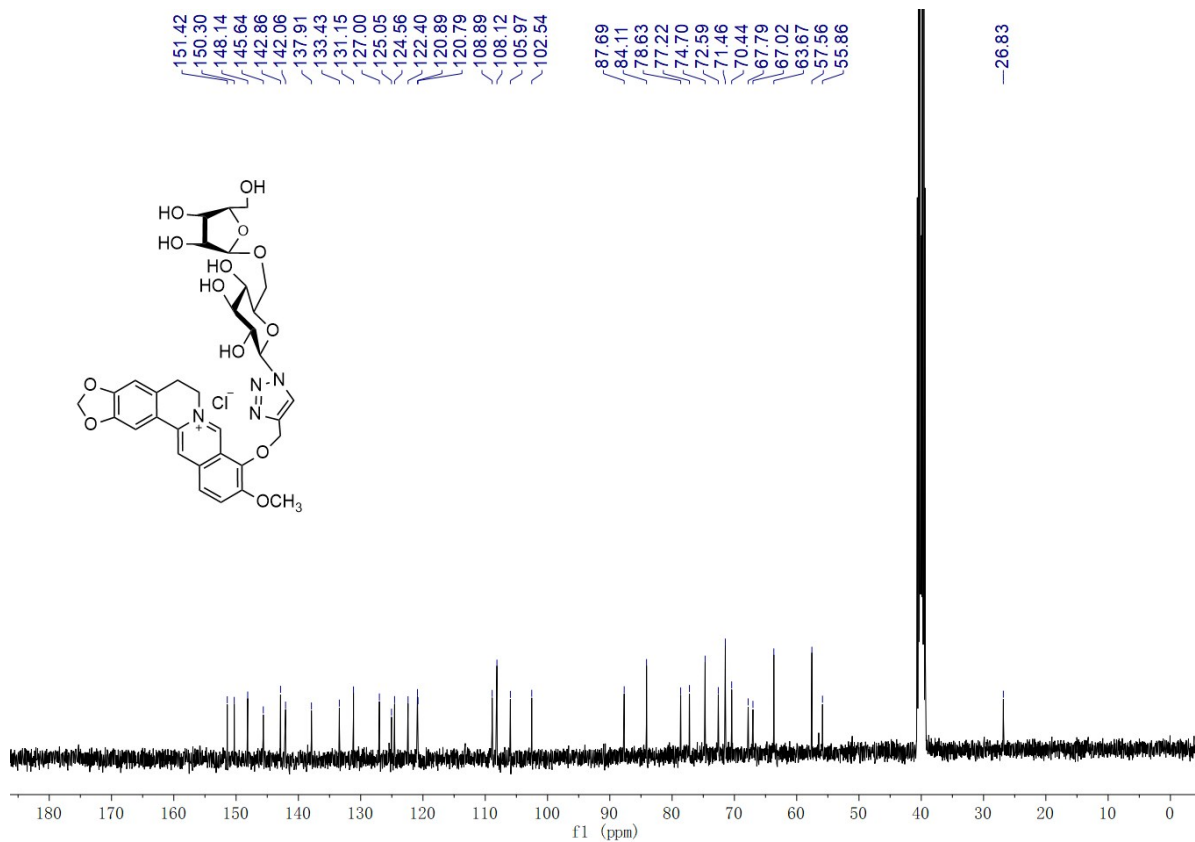

<sup>13</sup>C NMR spectrum of compound 3



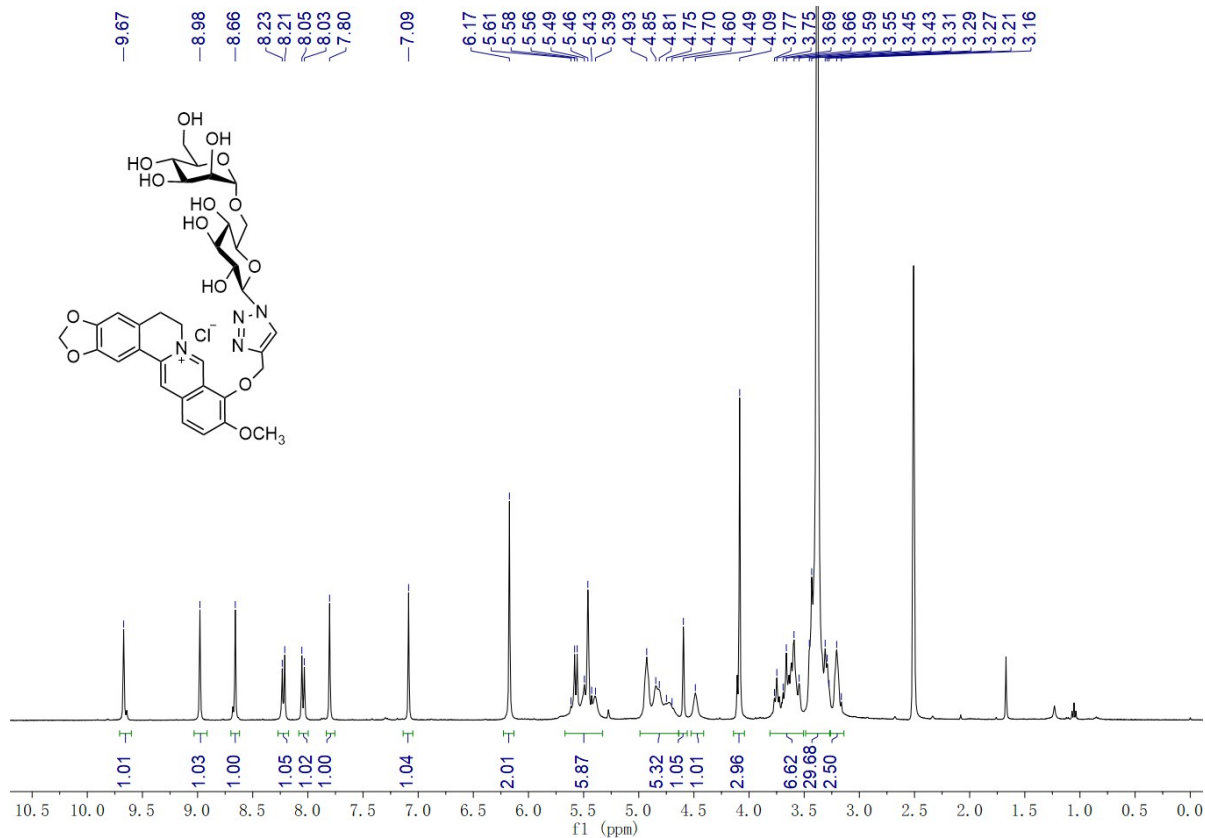

<sup>1</sup>H NMR spectrum of compound 4

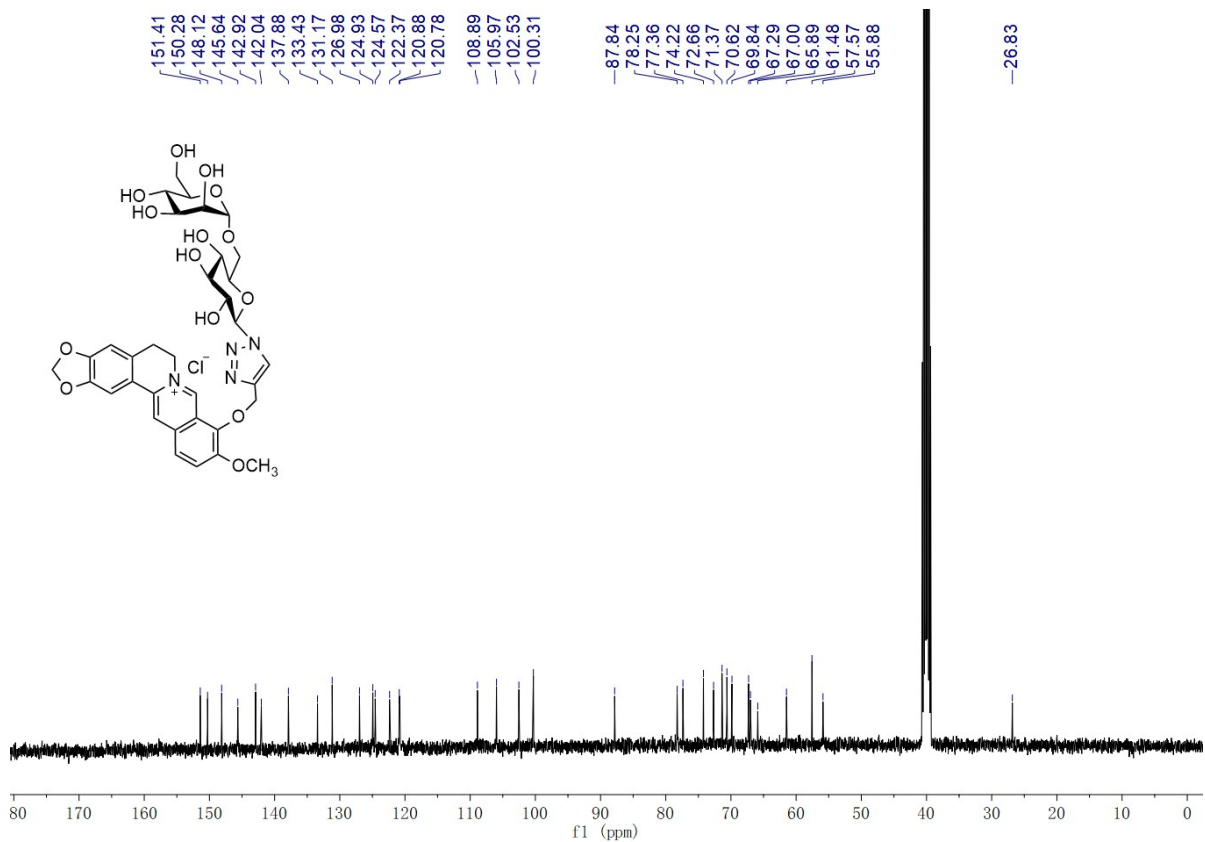

<sup>13</sup>C NMR spectrum of compound 4

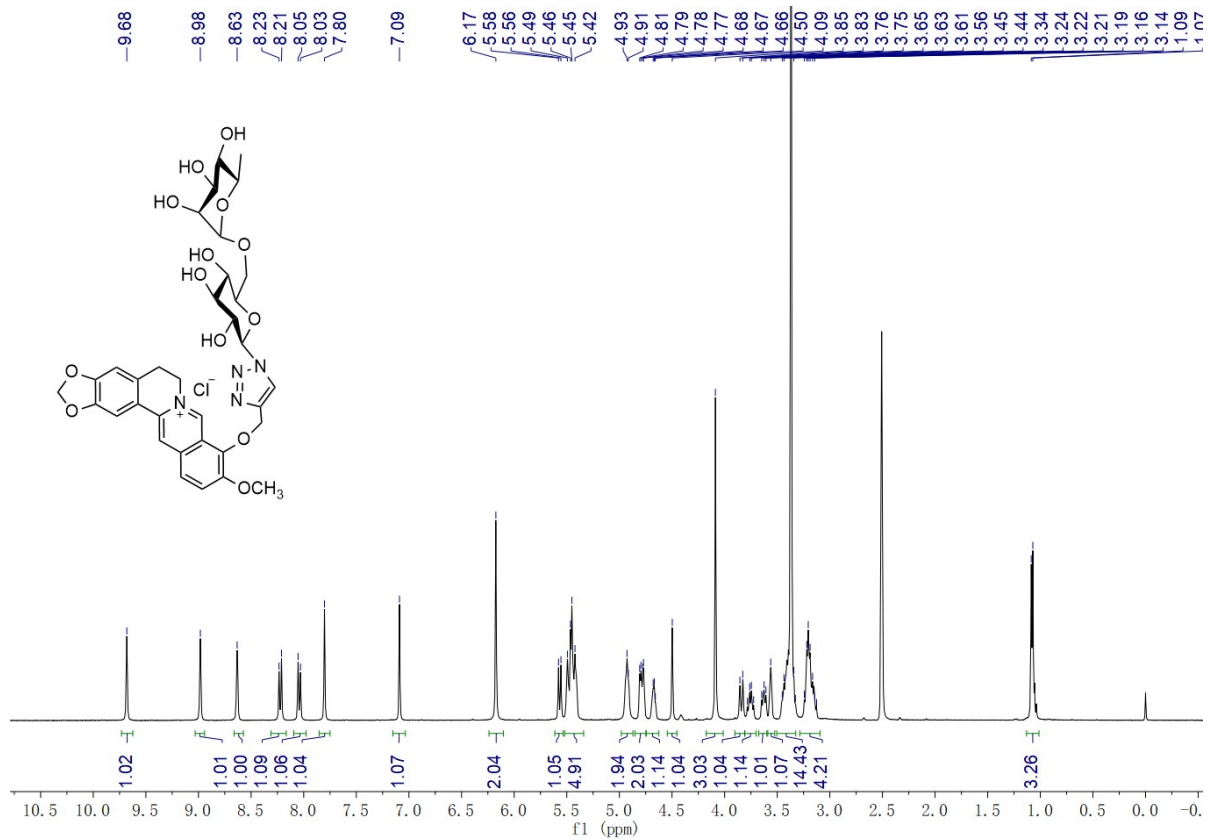

<sup>1</sup>H NMR spectrum of compound 5

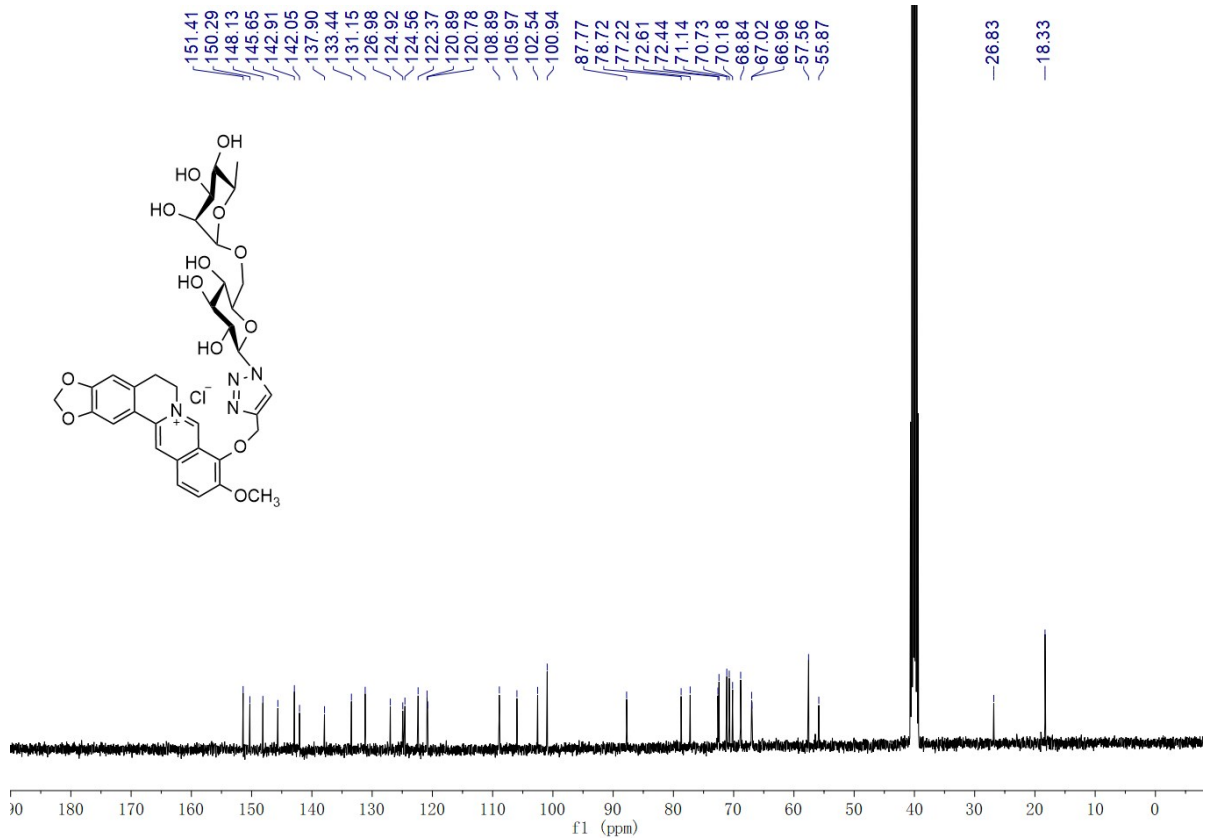

<sup>13</sup>C NMR spectrum of compound 5
